# Supplementary material for: Silicon dioxide covered Au and Ag nanoparticles for shell-isolated nanoparticle enhanced spectroscopies in the near-infrared
Source: Royal Society of Chemistry journal article supplement (doi:10.1039/c5ra08969g), 2015-01-01
Supplement: c5ra08969g1.pdf [file c5ra08969g1.pdf]

Supporting Information for  
**Silicon dioxide covered Au and Ag nanoparticles  
for Shell-Isolated Nanoparticles Enhanced  
Spectroscopies in the near-infrared**

Tatiana B. V. Neves,<sup>a</sup> Sandra M. Landi,<sup>b</sup> Lídia A. Sena,<sup>b</sup> Bráulio  
S. Archanjo,<sup>b</sup> Gustavo F. S. Andrade,<sup>a,\*</sup>

<sup>a</sup> Laboratório de Nanoestruturas Plasmônicas, Núcleo de Espectroscopia e Estrutura Molecular, Departamento de Química, Universidade Federal de Juiz de Fora, R. José Lourenço Kelmer, s/n, Campus Universitário, 36036-900, Juiz de Fora, Brazil.

<sup>b</sup> Divisão de Metrologia de Materiais, Instituto Nacional de Metrologia, Qualidade e Tecnologia (INMETRO), Av. Nossa Senhora das Graças, 50, Prédio 3, 25250-020, Duque de Caxias, Brazil.

\* Corresponding author: [gustavo.andrade@ufjf.edu.br](mailto:gustavo.andrade@ufjf.edu.br) ; Phone: +55(32)21023310.

### S.1 –TEM images of Ag@SiO<sub>2</sub> and Au@SiO<sub>2</sub>

Figure S1 presents TEM micrographs of Ag@SiO<sub>2</sub> nanoparticles prepared using AgNP obtained using Lee and Meisel's methodology.<sup>1</sup>

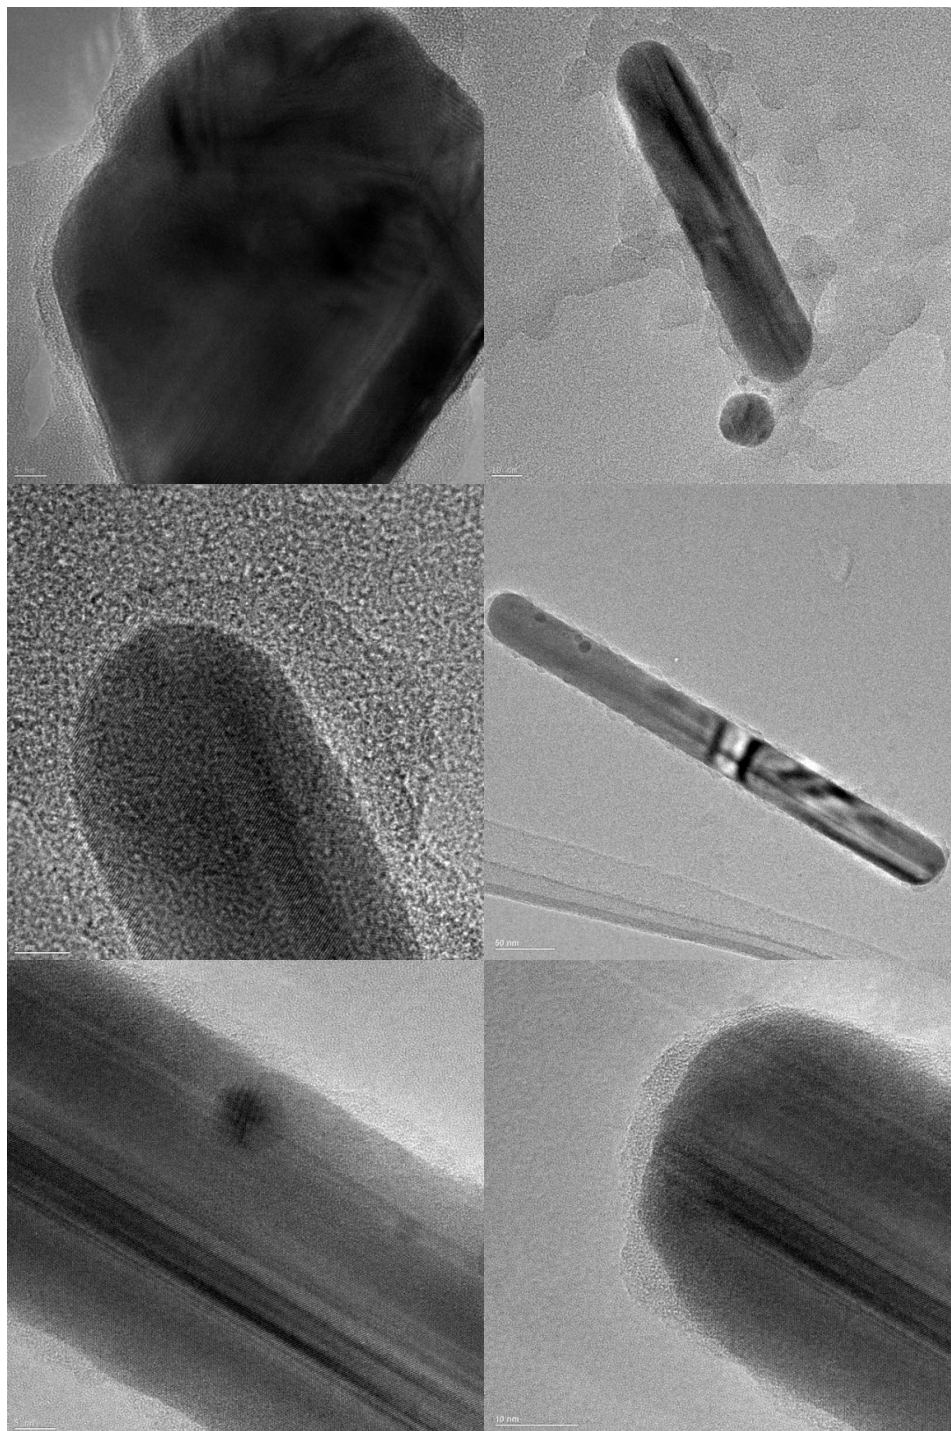

Figure S1. TEM micrographs of Ag@SiO<sub>2</sub> at different magnifications. The scale bars are presented in the images.

One can notice from the micrographs in Figure S1 that this methodology results in nanoparticles with very different shapes, but the silica layer can be observed over the Ag core, and no evident lack of silica layers was found in the micrographs.

Figure S2 present TEM micrographs for Au@SiO<sub>2</sub> nanoparticles.

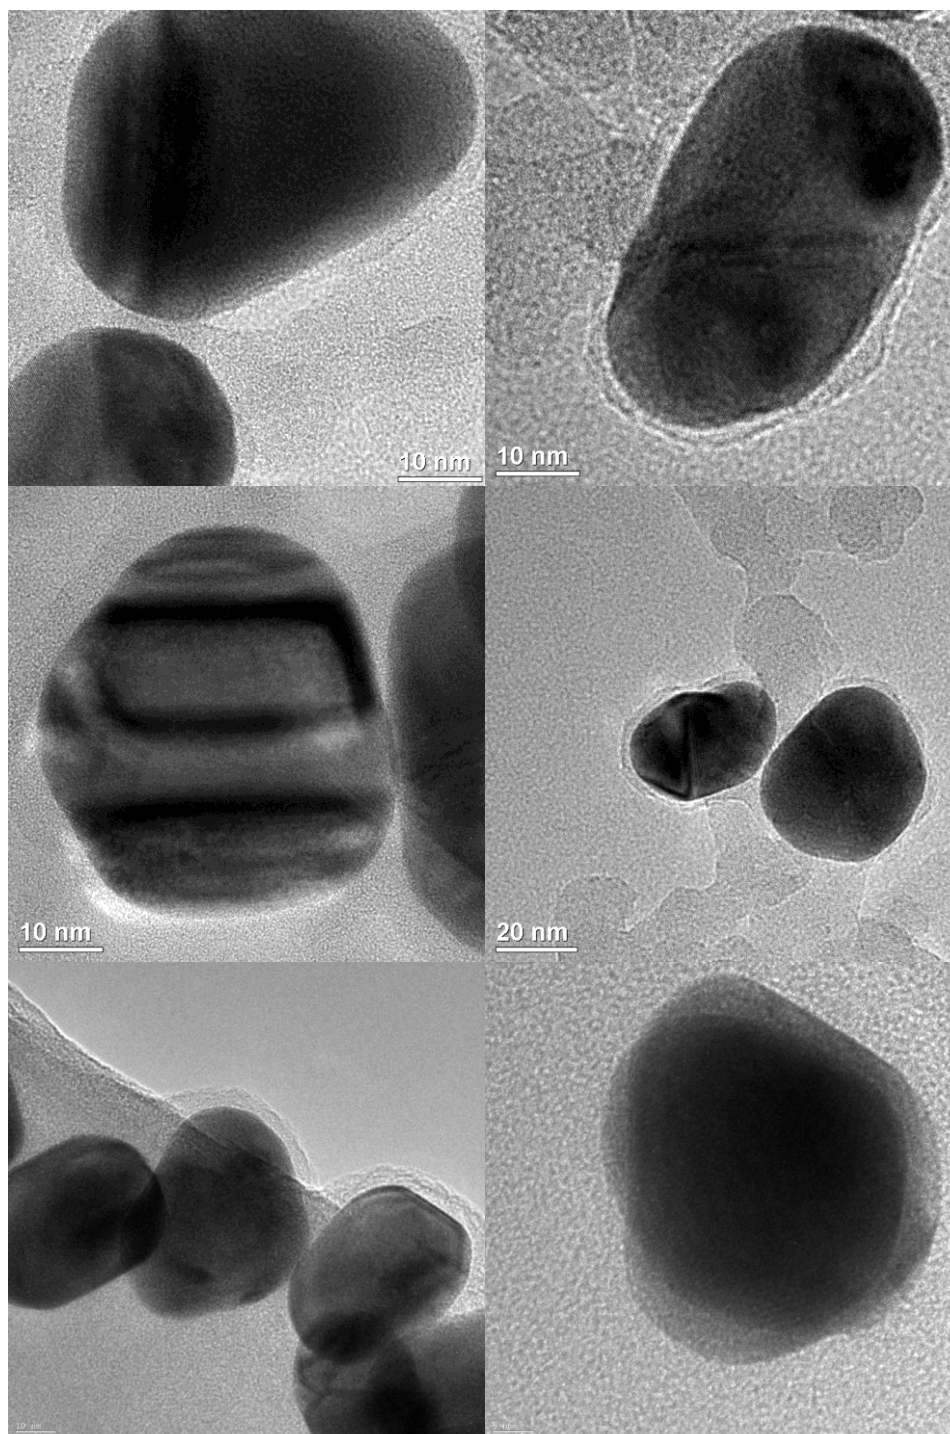

Figure S2. TEM micrographs of Au@SiO<sub>2</sub> at different magnifications. The scale bars are presented in the images.

Similar to the TEM micrographs for Ag@SiO<sub>2</sub> one can notice for Au@SiO<sub>2</sub> that the AuNP used present different shapes, ranging from spheroidal to cylindrical, which is expected considering the use of Frens' methodology.<sup>2</sup> However, the different shapes of the AuNP has not been observed to influence in any way the performance of the silica coverage.

## References

1. P. C. Lee and D. Meisel, *Journal of Physical Chemistry*, 1982, **86**, 3391-3395.
2. G. Frens, *Nature-Physical Science*, 1973, **241**, 20-22.
